# Supplementary material for: Inulin Supplementation Disturbs Hepatic Cholesterol and Bile Acid Metabolism Independent from Housing Temperature
Source: Nutrients. 2020 Oct 20;12(10):3200. doi: 10.3390/nu12103200 (PMC7589137; doi:10.3390/nu12103200)
Supplement: Supplementary file 1 [file nutrients-12-03200-s001.pdf]

## Supplementary Table 1

Supplementary Table 1. Composition of the Inulin and control diet.

|                       | S5714-E710 | S5714-E716 |
|-----------------------|------------|------------|
| Proximate contents    | CD         | ICD        |
| Carbohydrates         | 64,3       | 30, 8      |
| Crude Protein         | 21         | 21         |
| Crude Fat             | 5,1        | 5,1        |
| Crude fiber           | 0,2        | 33,2       |
| <b>Ingredients</b>    |            |            |
| %                     |            |            |
| Inulin                | 0          | 30         |
| Cellulose             | 0.2        | 5          |
| Starch                | 33         | 12         |
| Maltodextrin          | 19,9       | 6,1        |
| <b>Energy (MJ/kg)</b> | 16,2       | 10,7       |
| kcal%                 |            |            |
| Fat                   | 12         | 18,4       |
| Protein               | 22         | 33,3       |
| Carbohydrates         | 66         | 48,3       |

## Supplementary Figure 1

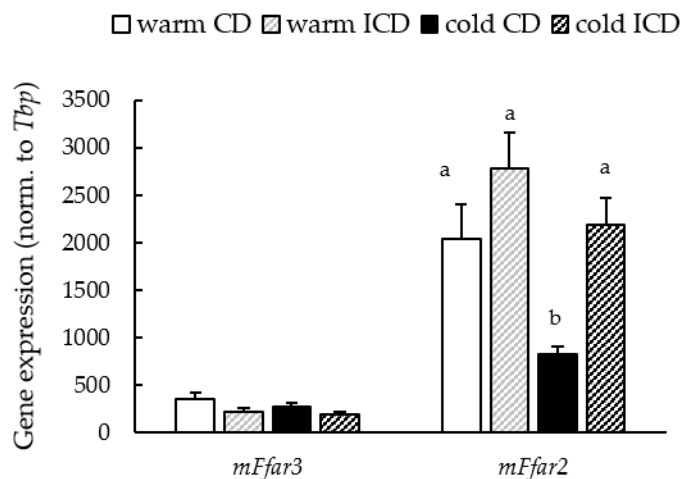

**Supplementary Figure 1.** Inulin does not affect expression of GPR41 and GPR43 in colon tissues. Gene expression of GPR41 (encoded by *Ffar3*) and GPR43 (encoded by *Ffar2*) in colon tissues. Levels are normalized to *Tbp* as housekeeper. Data are shown as mean values  $\pm$  SEM, different letters indicate significant differences between groups ( $p < 0.05$ ) determined by two-way ANOVA. CD warm: n=6, ICD warm: n=6, CD cold: n=6, ICD cold: n=4

## Supplementary Figure 2

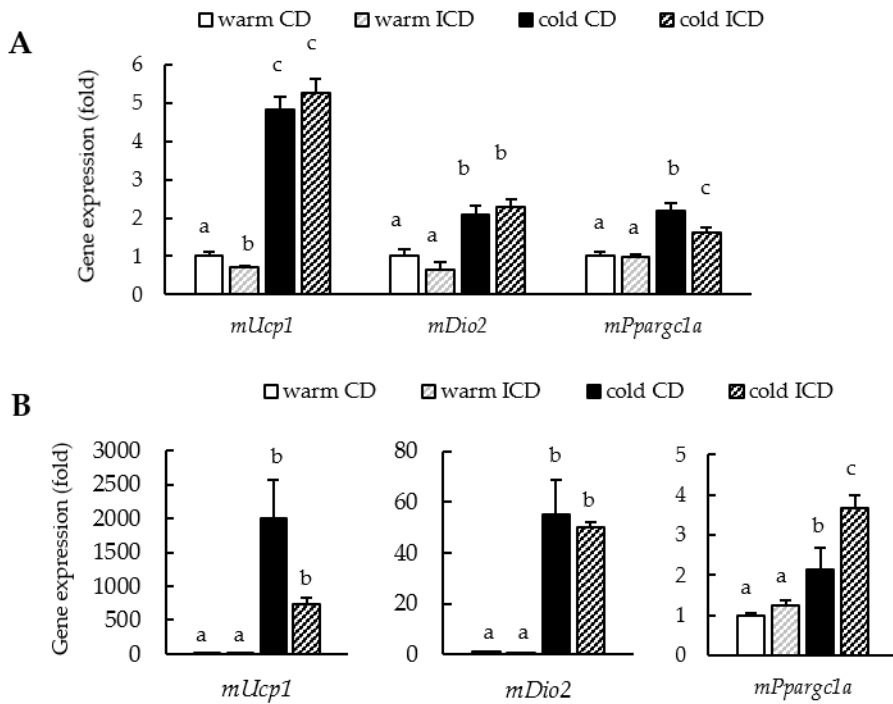

**Supplementary Figure 2.** Inulin does not affect BAT and ingWAT gene expression Relative gene expression of BAT marker genes in (A) BAT and (B) ingWAT. Levels are normalized to *Tbp* as housekeeper. Data are shown as mean values  $\pm$  SEM, different letters indicate significant differences between groups ( $p < 0.05$ ) determined by two-way ANOVA. CD warm: n=6, ICD warm: n=6, CD cold: n=6, ICD cold: n=5
